# Supplementary material for: Long-term stability and protection efficacy of the RBD-targeting COVID-19 mRNA vaccine in nonhuman primates
Source: Springer Nature journal article supplement (doi:10.1038/s41392-021-00861-4), 2021-12-24
Supplement: 41392_2021_861_MOESM1_ESM.pdf [file 41392_2021_861_MOESM1_ESM.pdf]

# Supplementary Materials for

## Long-term stability and protection efficacy of the RBD-targeting COVID-19 mRNA vaccine in nonhuman primates

Hui Zhao, Tie-Cheng Wang, Xiao-Feng Li, Na-Na Zhang, Liang Li, Chao Zhou, Yong-Qiang Deng, Tian-Shu Cao, Guan Yang, Rui-Ting Li, Yi-Jiao Huang, Yuan-Guo Li, Yi-Ming Zhang, Fang-Xu Li, Yu-Ren Zhou, Yu-Hang Jiang, Xi-Shan Lu, Shi-Hui Sun, Meng-Li Cheng, Kai-Ping Gu, Mei Zhang, Qing-Qing Ma, Xiao Yang, Bo Ying, Yu-Wei Gao, Cheng-Feng Qin.

Correspondence to: Cheng-Feng Qin, [qincf@bmi.ac.cn](mailto:qincf@bmi.ac.cn); Yu-wei Gao, [yuwei0901@outlook.com](mailto:yuwei0901@outlook.com);  
or Bo Ying, [bo.ying@abogenbio.com](mailto:bo.ying@abogenbio.com)

### **This PDF file includes:**

Materials and Methods  
Figure. S1

## **Materials and Methods**

### **Cytokine secretion assays**

Serum samples of animals on day 0 and 7 post challenge were collected by centrifugation and heat inactivated at 56°C. Serum concentrations of cytokines were measured with a ProcartaPlex NHP Cytokine/Chemokine/GF 37 plex (Invitrogen, #EXP370-40045-901) according to the manufacturer's instruction. Assays were performed on a Luminex 200™ machine equipped with xPONENT Software (ThermoFisher). We calculated the fold change of the cytokine level on day 7 post challenge compared with day 0. The heatmap of cytokines change were constructed using the pheatmap package (<https://cran.rstudio.com/web/packages/pheatmap/index.html>). Statistical significance was calculated by Mann-Whitney non-parametric t test.
